# Supplementary material for: Ellagic Acid Affects Metabolic and Transcriptomic Profiles and Attenuates Features of Metabolic Syndrome in Adult Male Rats
Source: MDPI journal article supplement (doi:10.3390/nu13030804), 2021-03-01
Supplement: s1 [file s1]

## SUPPLEMENTARY MATERIAL

### **Ellagic acid affects metabolic and transcriptomic profiles and attenuates features of metabolic syndrome in adult male rats**

Adéla Kábelová (1), Hana Malínská (2), Irena Marková (2), Olena Oliyarnyk (2), Blanka Chylíková (1), Ondřej Šeda (1)

<sup>1</sup> Institute of Biology and Medical Genetics, the First Faculty of Medicine, Charles University and the General University Hospital, Prague, Czech Republic

<sup>2</sup> Institute for Clinical and Experimental Medicine, Prague, Czech Republic

**Corresponding author:** Ondřej Šeda

Institute of Biology and Medical Genetics

First Faculty of Medicine, Charles University,

Albertov 4, 12800 Prague 2, Czech Republic

Tel: +420 224 968 180; email: [osed@lf1.cuni.cz](mailto:osed@lf1.cuni.cz)

## Supplementary tables

**Supplementary table S1.** Effect of ellagic acid supplementation on oxidative stress markers in liver, kidneys and heart of HFD and HFD-EA rats. Variables are mean  $\pm$  SEM, n = 6-8 for each group. GSH:GSSG; reduced:oxidized glutathione ratio, TBARS; thiobarbituric acid reactive substances, HFD; high-fat diet-fed rats, HFD-EA; high-fat diet-fed rats supplemented with ellagic acid

| <i>Oxidative stress markers</i>                                                | <b>HFD</b>       | <b>HFD-EA</b>   | <b>HFD x HFD-EA</b> |
|--------------------------------------------------------------------------------|------------------|-----------------|---------------------|
| <b>Liver</b>                                                                   |                  |                 |                     |
| Reduced glutathione ( $\mu\text{mol}/\text{mg}$ protein)                       | 38.1 $\pm$ 2     | 44.2 $\pm$ 3    | 0.15                |
| Oxidized glutathione ( $\mu\text{mol}/\text{mg}$ protein)                      | 2.47 $\pm$ 0.2   | 1.54 $\pm$ 0.1  | 0.006               |
| GSH:GSSG                                                                       | 16.3 $\pm$ 1     | 29.4 $\pm$ 2    | 0.0003              |
| Glutathione reductase (nmol NADPH/min/mg protein)                              | 105 $\pm$ 5      | 147 $\pm$ 17    | 0.037               |
| Glutathione peroxidase ( $\mu\text{mol}$ NADPH/min/mg protein)                 | 209 $\pm$ 22     | 272 $\pm$ 16    | 0.05                |
| Glutathione S-transferase (nmol CDNB/min/mg)                                   | 143 $\pm$ 11.9   | 156 $\pm$ 14.19 | 0.54                |
| Catalase, $\mu\text{mol}$ H <sub>2</sub> O <sub>2</sub> (NADPH/min/mg protein) | 1636 $\pm$ 141   | 2089 $\pm$ 93   | 0.031               |
| Superoxide dismutase (U/mg protein)                                            | 0.08 $\pm$ 0.006 | 0.1 $\pm$ 0.003 | 0.047               |
| TBARS (nmol/mg protein)                                                        | 1.88 $\pm$ 0.2   | 1.33 $\pm$ 0.1  | 0.028               |
| <b>Kidneys</b>                                                                 |                  |                 |                     |
| Reduced glutathione ( $\mu\text{mol}/\text{mg}$ protein)                       | 36.2 $\pm$ 2     | 44.6 $\pm$ 4    | 0.08                |
| Oxidized glutathione ( $\mu\text{mol}/\text{mg}$ protein)                      | 2.98 $\pm$ 0.3   | 1.78 $\pm$ 0.1  | 0.002               |
| GSH:GSSG                                                                       | 12.6 $\pm$ 0.6   | 25.4 $\pm$ 2    | 0.0002              |
| Glutathione reductase (nmol NADPH/min/mg protein)                              | 113 $\pm$ 7      | 119 $\pm$ 7     | 0.56                |
| Glutathione peroxidase ( $\mu\text{mol}$ NADPH/min/mg protein)                 | 214 $\pm$ 10     | 276 $\pm$ 21    | 0.025               |
| Glutathione S-transferase (nmol CDNB/min/mg)                                   | 26.4 $\pm$ 2     | 29 $\pm$ 2      | 0.37                |

|                                                                   |                  |                  |        |
|-------------------------------------------------------------------|------------------|------------------|--------|
| Catalase, $\mu\text{mol H}_2\text{O}_2$<br>(NADPH/min/mg protein) | 575 $\pm$ 27     | 730 $\pm$ 32     | 0.004  |
| Superoxide dismutase (U/mg<br>protein)                            | 0.03 $\pm$ 0.002 | 0.05 $\pm$ 0.003 | 0.0006 |
| TBARS (nmol/mg protein)                                           | 0.87 $\pm$ 0.06  | 0.83 $\pm$ 0.07  | 0.6612 |
| <b>Heart</b>                                                      |                  |                  |        |
| Reduced glutathione ( $\mu\text{mol/mg}$<br>protein)              | 45.2 $\pm$ 3     | 44.7 $\pm$ 3     | 0.88   |
| Oxidized glutathione ( $\mu\text{mol/mg}$<br>protein)             | 3.3 $\pm$ 0.1    | 3.55 $\pm$ 0.3   | 0.40   |
| GSH:GSSG                                                          | 13.9 $\pm$ 0.9   | 12.8 $\pm$ 0.7   | 0.43   |
| Glutathione reductase (nmol<br>NADPH/min/mg protein)              | 64.6 $\pm$ 6     | 80.1 $\pm$ 5     | 0.11   |
| Glutathione peroxidase ( $\mu\text{mol}$<br>NADPH/min/mg protein) | 108 $\pm$ 5      | 99.9 $\pm$ 5     | 0.32   |
| Glutathione S-transferase (nmol<br>CDNB/min/mg)                   | 38.8 $\pm$ 3     | 42 $\pm$ 5       | 0.56   |
| Catalase, $\mu\text{mol H}_2\text{O}_2$<br>(NADPH/min/mg protein) | 386 $\pm$ 22     | 446 $\pm$ 28     | 0.13   |
| Superoxide dismutase (U/mg<br>protein)                            | 0.05 $\pm$ 0.003 | 0.05 $\pm$ 0.003 | 0.32   |
| TBARS (nmol/mg protein)                                           | 0.81 $\pm$ 0.5   | 0.54 $\pm$ 0.02  | 0.0003 |

**Supplementary table S4.** Transcripts validated by qPCR and their expression changes in brown adipose tissue in response to ellagic acid administration to SHR-*Zbtb16*<sup>Lx/k.o.</sup> rat males

| Gene symbol    | Gene name                                               | P (HFD vs HFD-EA) | Fold change (microarray) | Fold change (qPCR) |
|----------------|---------------------------------------------------------|-------------------|--------------------------|--------------------|
| <i>Dio2</i>    | Iodothyronine deiodinase 2                              | 3.04E-10          | -24.35                   | -13.38             |
| <i>Gck</i>     | Glucokinase                                             | n.s.              | n.s.                     | n.s.               |
| <i>Pla2g2a</i> | phospholipase A2, group IIA (platelets, synovial fluid) | 9.43E-06          | 4.55                     | 8.47               |
| <i>Tnxb</i>    | tenascin XB                                             | 4.68E-06          | 2.95                     | 3.11               |
| <i>Nr4a1</i>   | nuclear receptor subfamily 4, group A, member 1         | 2.48E-09          | -5.75                    | -4.65              |
